# Supplementary material
Source: MDPI journal article supplement (https://www.mdpi.com/2073-4441/15/11/2109)
Supplement: s1 [file s1]

Archive with 4 entries (4 files):
- 20230420 Supplementary Spreadsheet S1.xlsx
- 20230420 Supplementary Spreadsheet S2.xlsx
- 20230420 Supplementary Spreadsheet S3.xlsx
- Round1 MS16 BIC-HAL Figure S1, Tables S1-S4.pdf
