# Supplementary material
Source: MDPI journal article supplement (https://www.mdpi.com/2073-4441/15/11/2109)
Supplement: s1 [file s1]

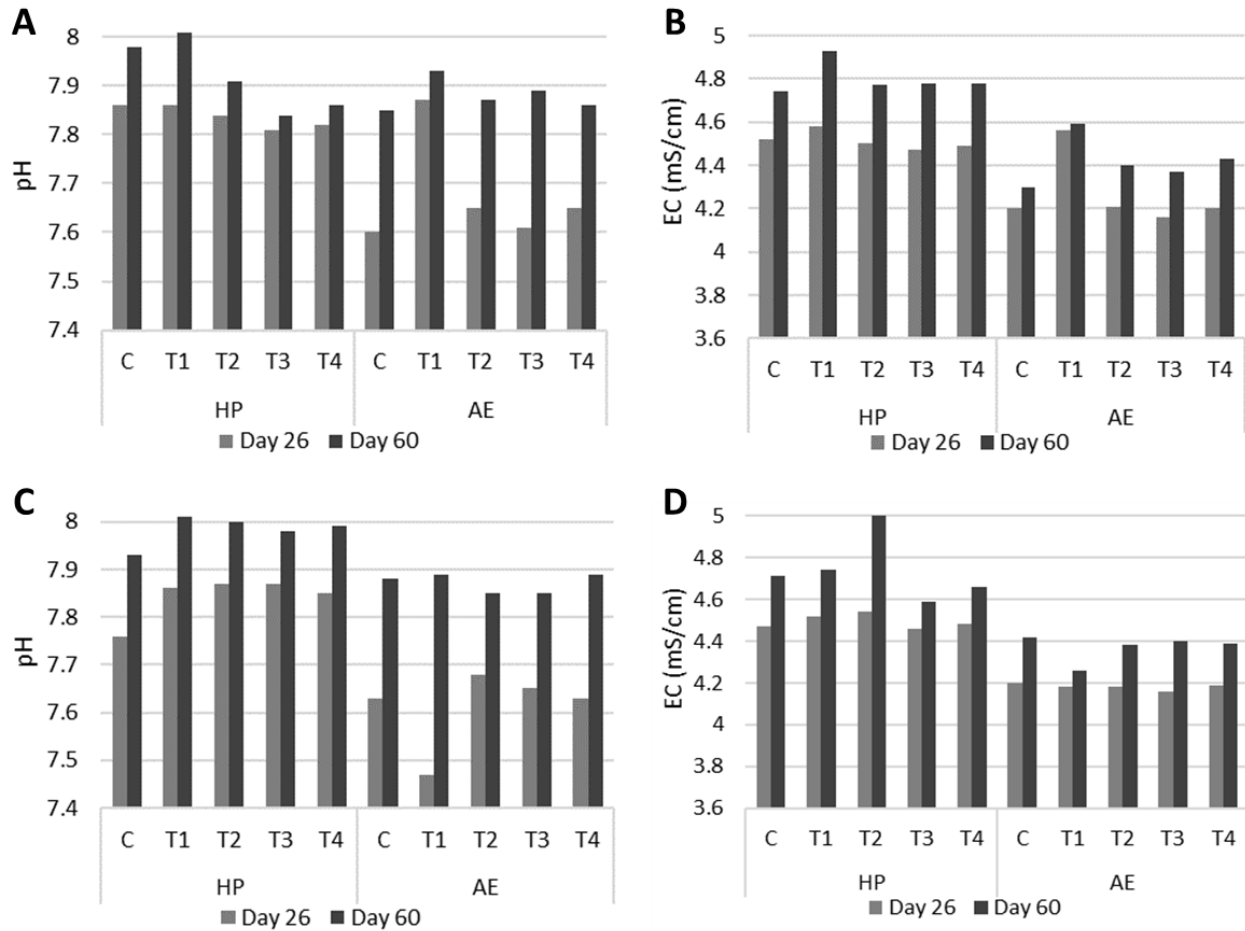

**Figure S1.** Parameters of the nutrient solutions in boxes of lettuce unexposed (A, B) and exposed (C, D) to pathogen *Pythium* sp., one day after microbial inoculates addition (day 26) and one day before harvest (day 60).

**Abbreviations:** HP: nutrient solution from inorganic nutrient source; AE: nutrient solution from aquaculture effluent from an aquaculture farm; T1: addition of RhizoVital42<sup>®</sup> (Andermatt Biocontrol AG, Switzerland); T2: addition of sludge from the aquaculture farm; T3: sludge from a wastewater treatment plant (Abwasserreinigungsanlagen, Au, Switzerland); T4: activated effective microorganism BodenFIT<sup>®</sup> (EM Schweiz AG, Switzerland).

**Table S1.** Technical details of the pikeperch (*Sander lucioperca*) aquaculture farm whose effluent water was used as nutrient solution containing organic nutrient sources and functioning as a proxy for decoupled aquaponics.

| Farm type | Farmed species           | Fish size (g) | Mean density (kg/m <sup>3</sup> ) | Total rearing volume (m <sup>3</sup> ) | Total fish biomass (kg) |
|-----------|--------------------------|---------------|-----------------------------------|----------------------------------------|-------------------------|
| RAS       | <i>Sander lucioperca</i> | 300-1000      | 37                                | 75                                     | 2000                    |

**Table S2.** Actions carried out during lettuce culture.

| Day      | Action                                                                                   |
|----------|------------------------------------------------------------------------------------------|
| 1        | Seeding of seeds in the rockwool cubes in trays                                          |
| 12       | Seedlings with rockwool transplanted into floating rafts                                 |
| 12 to 25 | Increasing nutrient concentration in boxes to reach target values                        |
| 25       | Target values of nutrient concentration reached and addition of microbial <i>inocula</i> |
| 26       | Water sampling and change #1                                                             |
| 27       | Photosynthetic photon flux density set to 250 for growing plants                         |
| 30       | Challenge test: Addition of the pathogen <i>Pythium</i> grown on millet                  |
| 32       | Fe EDTA addition in AE boxes to reach the same amount as in HP boxes                     |
| 32       | Water sampling and exchange #2                                                           |
| 39       | Water sampling and exchange #3                                                           |
| 46       | Water sampling and exchange #4                                                           |
| 53       | Water sampling and exchange #5                                                           |
| 60       | Dualex measurements, water sampling                                                      |
| 61       | Harvest and sampling for measurements of biomass composition                             |

**Table S3.** Average element concentrations in the shoots of unexposed lettuces at harvest (Day 61); values are means for each treatment, irrespective of the system; the p-values were calculated with a type 2 ANOVA following the reduced model disregarding the interaction between the two factors.

| Treatment        | C                  | T1                | T2                 | T3                 | T4                 | ANOVA          |
|------------------|--------------------|-------------------|--------------------|--------------------|--------------------|----------------|
| Root/shoot ratio | 0.22 <sup>ab</sup> | 0.26 <sup>a</sup> | 0.21 <sup>b</sup>  | 0.25 <sup>ab</sup> | 0.22 <sup>ab</sup> | <i>T</i> : *   |
| Mg, mg/g         | 4.14 <sup>ab</sup> | 3.47 <sup>b</sup> | 4.27 <sup>a</sup>  | 4.14 <sup>ab</sup> | 3.38 <sup>b</sup>  | <i>T</i> : **  |
| S, mg/g          | 2.54 <sup>a</sup>  | 2.10 <sup>b</sup> | 2.52 <sup>a</sup>  | 2.39 <sup>ab</sup> | 2.17 <sup>ab</sup> | <i>T</i> : *   |
| Zn, µg/g         | 43.1 <sup>ab</sup> | 36.9 <sup>b</sup> | 43.8 <sup>ab</sup> | 48.9 <sup>a</sup>  | 35.6 <sup>b</sup>  | <i>T</i> : *** |

*Different superscripts indicate significant differences for the treatment factor.*

\*:  $p < 0.05$ ; \*\*:  $p < 0.01$ ; \*\*\*:  $p < 0.001$ .

**Table S4.** Average copper concentrations in the shoots of lettuces exposed to the pathogen *Pythium* sp. at harvest (Day 61); values are means for each treatment, irrespective of the system; the p-values were calculated with a type 2 ANOVA following the reduced model disregarding the interaction between the two factors.

| Treatment | C                 | T1                 | T2                 | T3                 | T4                | ANOVA        |
|-----------|-------------------|--------------------|--------------------|--------------------|-------------------|--------------|
| Cu        | 8.37 <sup>b</sup> | 8.93 <sup>ab</sup> | 8.97 <sup>ab</sup> | 10.68 <sup>a</sup> | 8.45 <sup>b</sup> | <i>T</i> : * |

*Different superscripts indicate significant differences for the treatment factor.*

\*:  $p < 0.05$ .
