# Supplementary material
Source: MDPI journal article supplement (https://www.mdpi.com/2073-4441/15/11/2109)
Supplement: s1 [file s1 › 20230420 Supplementary Spreadsheet S1.xlsx]

## Sheet: Water
date	Box No.	Volume L	T °C	pH	EC µS/cm	DO mg/L	DO %	ET L	Notes	Sodium	Potassium	Calcium	Magnesium	Sulfat	Chlorid	Phosphat	Nitrat
2021-07-30	HP-C Unexposed	5.6			678
2021-07-30	HP-T1 Unexposed	5.6			685
2021-07-30	HP-T2 Unexposed	5.6			706
2021-07-30	HP-T3 Unexposed	5.6			709
2021-07-30	HP-T4 Unexposed	5.6			698
2021-07-30	HP-C Exposed	5.6			683
2021-07-30	HP-T1 Exposed	5.6			687
2021-07-30	HP-T2 Exposed	5.6			690
2021-07-30	HP-T3 Exposed	5.6			678
2021-07-30	HP-T4 Exposed	5.6			693
2021-08-02	HP-C Unexposed	5.87	25.4	8.14	923	7.82	100.9
2021-08-02	HP-T1 Unexposed	5.87	24.5	8.12	937	7.81	99.8
2021-08-02	HP-T2 Unexposed	5.87	24.2	8.13	908	7.91	100.1
2021-08-02	HP-T3 Unexposed	5.87	24.2	8.1	945	7.88	99.5
2021-08-02	HP-T4 Unexposed	5.87	24.3	8.11	917	7.84	100.2
2021-08-02	HP-C Exposed	5.87	25.1	8.13	924	7.94	101.7
2021-08-02	HP-T1 Exposed	5.87	26	8.15	909	7.75	100.6
2021-08-02	HP-T2 Exposed	5.87	23.9	8.11	909	8.02	100.9
2021-08-02	HP-T3 Exposed	5.87	23.3	8.09	25	7.96	99.7
2021-08-02	HP-T4 Exposed	5.87	23.4	8.08	948	7.93	99.7
2021-08-04	HP-C Unexposed	6.11			1111
2021-08-04	HP-T1 Unexposed	6.11			1103
2021-08-04	HP-T2 Unexposed	6.11			1099
2021-08-04	HP-T3 Unexposed	6.11			1096
2021-08-04	HP-T4 Unexposed	6.11			1071
2021-08-04	HP-C Exposed	6.11			1153
2021-08-04	HP-T1 Exposed	6.11			1118
2021-08-04	HP-T2 Exposed	6.11			1169
2021-08-04	HP-T3 Exposed	6.11			1095
2021-08-04	HP-T4 Exposed	6.11			1092
2021-08-05	HP-C Unexposed	6.11			1123
2021-08-05	HP-T1 Unexposed	6.14			1127
2021-08-05	HP-T2 Unexposed	6.14			1121
2021-08-05	HP-T3 Unexposed	6.14			1138
2021-08-05	HP-T4 Unexposed	6.17			1117
2021-08-05	HP-C Exposed	6.11			1182
2021-08-05	HP-T1 Exposed	6.11			1144
2021-08-05	HP-T2 Exposed	6.11			1189
2021-08-05	HP-T3 Exposed	6.14			1129
2021-08-05	HP-T4 Exposed	6.14			1137
2021-08-06	HP-C Unexposed	6.41			1300
2021-08-06	HP-T1 Unexposed	6.44			1312
2021-08-06	HP-T2 Unexposed	6.44			1294
2021-08-06	HP-T3 Unexposed	6.38			1304
2021-08-06	HP-T4 Unexposed	6.41			1300
2021-08-06	HP-C Exposed	6.35			1383
2021-08-06	HP-T1 Exposed	6.35			1309
2021-08-06	HP-T2 Exposed	6.35			1382
2021-08-06	HP-T3 Exposed	6.44			1326
2021-08-06	HP-T4 Exposed	6.44			1315
2021-08-08	HP-C Unexposed	6.81			1517
2021-08-08	HP-T1 Unexposed	6.84			1558
2021-08-08	HP-T2 Unexposed	6.84			1522
2021-08-08	HP-T3 Unexposed	6.78			1558
2021-08-08	HP-T4 Unexposed	6.81			1527
2021-08-08	HP-C Exposed	6.75			1873
2021-08-08	HP-T1 Exposed	6.75			1611
2021-08-08	HP-T2 Exposed	6.75			1654
2021-08-08	HP-T3 Exposed	6.84			1571
2021-08-08	HP-T4 Exposed	6.84			1567
2021-08-09	HP-C Unexposed	7.41			1792
2021-08-09	HP-T1 Unexposed	7.44			1850
2021-08-09	HP-T2 Unexposed	7.44			1790
2021-08-09	HP-T3 Unexposed	7.38			1870
2021-08-09	HP-T4 Unexposed	7.41			1834
2021-08-09	HP-C Exposed	7.25			2160
2021-08-09	HP-T1 Exposed	7.35			1950
2021-08-09	HP-T2 Exposed	7.35			1985
2021-08-09	HP-T3 Exposed	7.44			1864
2021-08-09	HP-T4 Exposed	7.44			1870
2021-08-10	HP-C Unexposed	9.71		7.99	2470
2021-08-10	HP-T1 Unexposed	9.74		8	2560
2021-08-10	HP-T2 Unexposed	9.74		7.98	2500
2021-08-10	HP-T3 Unexposed	9.68		7.96	2630
2021-08-10	HP-T4 Unexposed	9.71		7.86	2560
2021-08-10	HP-C Exposed	8.25		8.03	2520
2021-08-10	HP-T1 Exposed	9.65		8	2700
2021-08-10	HP-T2 Exposed	9.65		7.97	2710
2021-08-10	HP-T3 Exposed	9.74		7.96	2570
2021-08-10	HP-T4 Exposed	9.74		7.86	2580
2021-08-11	HP-C Unexposed	12.71			2950
2021-08-11	HP-T1 Unexposed	12.24			3010
2021-08-11	HP-T2 Unexposed	12.74			3030
2021-08-11	HP-T3 Unexposed	12.18			3090
2021-08-11	HP-T4 Unexposed	12.21			3030
2021-08-11	HP-C Exposed	10.75			3100
2021-08-11	HP-T1 Exposed	12.15			3200
2021-08-11	HP-T2 Exposed	12.15			3190
2021-08-11	HP-T3 Exposed	12.24			3030
2021-08-11	HP-T4 Exposed	12.24			3070
2021-08-12	HP-C Unexposed	15
2021-08-12	HP-T1 Unexposed	15
2021-08-12	HP-T2 Unexposed	15
2021-08-12	HP-T3 Unexposed	15
2021-08-12	HP-T4 Unexposed	15
2021-08-12	HP-C Exposed	15
2021-08-12	HP-T1 Exposed	15
2021-08-12	HP-T2 Exposed	15
2021-08-12	HP-T3 Exposed	15
2021-08-12	HP-T4 Exposed	15
2021-08-13	HP-C Unexposed		21.7	7.86	4.52	8.01	98.7			572.175	20.034	65.56	16.1424	35.3361	980.335	26.8697	88.578
2021-08-13	HP-T1 Unexposed		25.5	7.86	4.58	7.14	90.3			391.671	15.1568	43.779	11.5156	32.6218	873.723	27.6042	49.4421
2021-08-13	HP-T2 Unexposed		22.2	7.84	4.5	7.99	96.8			603.295	20.1599	71.456	17.1434	37.8655	1077.17	25.1199	94.527
2021-08-13	HP-T3 Unexposed		21.7	7.81	4.47	7.96	96.4			508.401	20.028	55.4956	14.0572	32.7227	846.058	23.154	78.8402
2021-08-13	HP-T4 Unexposed		21.9	7.82	4.49	7.88	76.2			578.611	21.0351	68.7696	16.5425	37.2269	975.36	24.1046	88.1044
2021-08-13	HP-C Exposed		21	7.76	4.47	8	96.5			609.535	20.7872	77.0809	18.2213	42.4118	1112.76	21.2746	100.846
2021-08-13	HP-T1 Exposed		23.2	7.86	4.52	7.77	96.6			573.17	19.6716	67.008	16.2858	37.2773	1050.93	27.7122	76.2296
2021-08-13	HP-T2 Exposed		23.9	7.87	4.54	8	99.1			577.003	19.9424	67.0568	16.2205	38.6387	1108.36	24.8391	95.7168
2021-08-13	HP-T3 Exposed		21.3	7.87	4.46	8.11	97.4			354.251	14.1438	44.5391	11.7334	28.521	740.069	20.5617	66.4919
2021-08-13	HP-T4 Exposed		20.9	7.85	4.48	8.16	97.3			552.043	18.5898	67.4305	16.3647	32.3613	851.826	29.3541	76.6917
2021-08-19	HP-C Unexposed		24.1	7.67	4.61
2021-08-19	HP-T1 Unexposed		26.1	7.55	4.27			1.75
2021-08-19	HP-T2 Unexposed		24	7.86	4.35			1
2021-08-19	HP-T3 Unexposed		23.8	7.86	4.56			0
2021-08-19	HP-T4 Unexposed		23.7	7.91	4.6			0
2021-08-19	HP-C Exposed		24.6	7.91	4.61			0
2021-08-19	HP-T1 Exposed		26.3	7.95	4.15			1.8
2021-08-19	HP-T2 Exposed		27.3	7.97	4.74			0
2021-08-19	HP-T3 Exposed		25.4	7.93	4.23			1.3
2021-08-19	HP-T4 Exposed		24.1	7.95	4.41			0.7
2021-08-23	HP-C Unexposed		20.5	7.88	4.66
2021-08-23	HP-T1 Unexposed		21.8	7.89	4.35
2021-08-23	HP-T2 Unexposed		20.7	7.88	4.4
2021-08-23	HP-T3 Unexposed		20.5	7.88	4.62
2021-08-23	HP-T4 Unexposed		20.5	7.89	4.67
2021-08-23	HP-C Exposed		20.2	7.91	4.68
2021-08-23	HP-T1 Exposed		21.4	7.88	4.21
2021-08-23	HP-T2 Exposed		22.1	7.93	4.88
2021-08-23	HP-T3 Exposed		21.2	7.89	4.31
2021-08-23	HP-T4 Exposed		20.6	7.93	4.48
2021-08-26	HP-C Unexposed		24.2	8.01	4.89	7.64	97.4	2.5
2021-08-26	HP-T1 Unexposed		26	8.05	4.51	7.43	97.1	1.6
2021-08-26	HP-T2 Unexposed		24.5	7.99	4.55	7.33	94.5	1.5
2021-08-26	HP-T3 Unexposed		24.4	8.01	4.86	7.37	94.5	1.4
2021-08-26	HP-T4 Unexposed		24.3	8.01	4.86	7.62	97	1.5
2021-08-26	HP-C Exposed		23.4	7.95	4.9	7.68	97.3	1
2021-08-26	HP-T1 Exposed		25.7	7.99	4.36	7.6	98.1	1.6
2021-08-26	HP-T2 Exposed		25.6	8	5.15	7.46	97.5	2.5
2021-08-26	HP-T3 Exposed		24.5	7.98	4.46	7.54	97.7	2
2021-08-26	HP-T4 Exposed		23.8	8	4.63	7.68	97.3	1.5
2021-08-30	HP-C Unexposed		24.2	8.02	4.55
2021-08-30	HP-T1 Unexposed		25.7	8.04	4.51
2021-08-30	HP-T2 Unexposed		24.9	8.12	4.51
2021-08-30	HP-T3 Unexposed		24.3	8.13	4.57
2021-08-30	HP-T4 Unexposed		24.6	8.12	4.63
2021-08-30	HP-C Exposed		23.5	7.97	4.83
2021-08-30	HP-T1 Exposed		26.7	8.07	4.48
2021-08-30	HP-T2 Exposed		26.5	8.23	4.75
2021-08-30	HP-T3 Exposed		24.7	8.15	4.36
2021-08-30	HP-T4 Exposed		24.5	8.15	4.54
2021-09-02	HP-C Unexposed		23.2	8.23	4.7	8.04	99	1.5
2021-09-02	HP-T1 Unexposed		25.5	8.28	4.65	7.65	98.4	2
2021-09-02	HP-T2 Unexposed		24.3	8.24	4.7	7.47	95.3	2
2021-09-02	HP-T3 Unexposed		23	8.14	4.76	7.31	91.1	1.5
2021-09-02	HP-T4 Unexposed		23.9	8.23	4.8	7.82	97.8	1.5
2021-09-02	HP-C Exposed		23.4	8.28	5	8.01	99.1	2.5
2021-09-02	HP-T1 Exposed		25.7	8.25	4.7	7.76	99.4	2
2021-09-02	HP-T2 Exposed		26	8.29	5.03	7.63	98.6	2
2021-09-02	HP-T3 Exposed		23.9	8.24	4.51	7.9	98.7	1.5
2021-09-02	HP-T4 Exposed		23.7	8.27	4.73	7.89	98.4	1.5
2021-09-06	HP-C Unexposed		24.5	8.31	4.58
2021-09-06	HP-T1 Unexposed		25.3	8.32	4.54
2021-09-06	HP-T2 Unexposed		24.2	8.3	4.54
2021-09-06	HP-T3 Unexposed		24.2	8.15	4.58
2021-09-06	HP-T4 Unexposed		24.3	8.28	4.6
2021-09-06	HP-C Exposed		23.8	8.35	4.54
2021-09-06	HP-T1 Exposed		26.5	8.35	4.57
2021-09-06	HP-T2 Exposed		26.4	8.36	4.78
2021-09-06	HP-T3 Exposed		25	8.32	4.47
2021-09-06	HP-T4 Exposed		24.2	8.34	4.56
2021-09-09	HP-C Unexposed		23.1	8.16	4.73	8.25	101.6	2
2021-09-09	HP-T1 Unexposed		24.7	8.2	4.72	7.77	99	2
2021-09-09	HP-T2 Unexposed		23.3	8.21	4.7	7.72	96.8	2
2021-09-09	HP-T3 Unexposed		23.1	8.09	4.76	7.43	91.9	2
2021-09-09	HP-T4 Unexposed		22.9	8.12	4.81	8.01	98.9	2
2021-09-09	HP-C Exposed		23.1	8.18	4.73	8.12	100.2	2
2021-09-09	HP-T1 Exposed		24.6	8.18	4.81	7.79	99.1	2.5
2021-09-09	HP-T2 Exposed		25.4	8.17	5.09	7.88	100	2.5
2021-09-09	HP-T3 Exposed		23.4	8.15	4.63	8.08	99.6	2
2021-09-09	HP-T4 Exposed		23.2	8.19	4.75	8.03	99.5	2
2021-09-16	HP-C Unexposed		19.3	7.98	4.74	8.52	99.5	2		230.74		26.2909	6.4852	40.4286	1223.18	12.5686
2021-09-16	HP-T1 Unexposed		20.1	8.01	4.93	8.57	100.5	2		451.661		53.6356	10.9463	38.9244	1178.03	11.1428
2021-09-16	HP-T2 Unexposed		19.8	7.91	4.77	7.78	91.5	2		680.361		89.0616	16.3825	41.3866	1211.29	11.0996
2021-09-16	HP-T3 Unexposed		19.2	7.84	4.78	7.59	97.5	2		682.691		90.2791	15.9431	40.9496	1227.19	9.60899
2021-09-16	HP-T4 Unexposed		19.7	7.86	4.78	7.91	92	2		396.444		40.6637	8.61315	30.8235	980.991	10.1923
2021-09-16	HP-C Exposed		17.9	7.93	4.71	8.55	98	2		404.701		49.7397	10.5616	30.521	892.475	11.9421
2021-09-16	HP-T1 Exposed		19.9	8.01	4.74	8.47	99.3	2		528.408		59.5958	11.7513	30.6807	864.168	11.3372
2021-09-16	HP-T2 Exposed		20	8	5.01	8.53	99.9	2		396.651		45.4492	9.37386	37.521	1142.13	9.86822
2021-09-16	HP-T3 Exposed		18.9	7.98	4.59	8.4	96.8	2		449.072		54.2357	11.0145	29.0924	835.087	10.5595
2021-09-16	HP-T4 Exposed		18.6	7.99	4.66	8.56	98.4	2		301.89		32.7723	7.55786	26.3109	761.186	11.51
2021-07-30	AP-C Unexposed	5			691
2021-07-30	AP-T1 Unexposed	5			673
2021-07-30	AP-T2 Unexposed	5			688
2021-07-30	AP-T3 Unexposed	5			685
2021-07-30	AP-T4 Unexposed	5			683
2021-07-30	AP-C Exposed	5			676
2021-07-30	AP-T1 Exposed	5			683
2021-07-30	AP-T2 Exposed	5			684
2021-07-30	AP-T3 Exposed	5			689
2021-07-30	AP-T4 Exposed	5			681
2021-08-02	AP-C Unexposed	5.3	22.5	8.1	922	8.21	100.7
2021-08-02	AP-T1 Unexposed	5.3	22.4	8.09	920	8.23	100.6
2021-08-02	AP-T2 Unexposed	5.3	22.6	8.08	947	8.1	99.9
2021-08-02	AP-T3 Unexposed	5.3	23.2	8.11	908	8.1	100.4
2021-08-02	AP-T4 Unexposed	5.3	24.4	8.1	924	7.95	100.6
2021-08-02	AP-C Exposed	5.3	22.5	8.07	928	8.19	100.4
2021-08-02	AP-T1 Exposed	5.3	22	8.09	921	8.17	99.4
2021-08-02	AP-T2 Exposed	5.3	22.7	8.09	912	8.14	100.3
2021-08-02	AP-T3 Exposed	5.3	22.9	8.09	915	8.13	100.4
2021-08-02	AP-T4 Exposed	5.3	23.3	8.03	919	8.18	101.3
2021-08-04	AP-C Unexposed	5.6			1134
2021-08-04	AP-T1 Unexposed	5.6			1149
2021-08-04	AP-T2 Unexposed	5.6			1206
2021-08-04	AP-T3 Unexposed	5.6			1117
2021-08-04	AP-T4 Unexposed	5.6			1167
2021-08-04	AP-C Exposed	5.6			1124
2021-08-04	AP-T1 Exposed	5.6			1139
2021-08-04	AP-T2 Exposed	5.6			1149
2021-08-04	AP-T3 Exposed	5.6			1098
2021-08-04	AP-T4 Exposed	5.6			1136
2021-08-05	AP-C Unexposed	5.63			1146
2021-08-05	AP-T1 Unexposed	5.6			1170
2021-08-05	AP-T2 Unexposed	5.6			1220
2021-08-05	AP-T3 Unexposed	5.63			1150
2021-08-05	AP-T4 Unexposed	5.6			1196
2021-08-05	AP-C Exposed	5.63			1146
2021-08-05	AP-T1 Exposed	5.63			1168
2021-08-05	AP-T2 Exposed	5.6			1154
2021-08-05	AP-T3 Exposed	5.66			1144
2021-08-05	AP-T4 Exposed	5.63			1164
2021-08-06	AP-C Unexposed	5.87			1313
2021-08-06	AP-T1 Unexposed	5.84			1333
2021-08-06	AP-T2 Unexposed	5.84			1398
2021-08-06	AP-T3 Unexposed	5.87			1300
2021-08-06	AP-T4 Unexposed	5.84			1386
2021-08-06	AP-C Exposed	5.87			1306
2021-08-06	AP-T1 Exposed	5.87			1324
2021-08-06	AP-T2 Exposed	5.84			1307
2021-08-06	AP-T3 Exposed	5.96			1314
2021-08-06	AP-T4 Exposed	5.87			1337
2021-08-08	AP-C Unexposed	6.27			1562
2021-08-08	AP-T1 Unexposed	6.24			1612
2021-08-08	AP-T2 Unexposed	6.14			1623
2021-08-08	AP-T3 Unexposed	6.27			1547
2021-08-08	AP-T4 Unexposed	6.14			1679
2021-08-08	AP-C Exposed	6.27			1531
2021-08-08	AP-T1 Exposed	6.27			1584
2021-08-08	AP-T2 Exposed	6.24			1518
2021-08-08	AP-T3 Exposed	6.73			1530
2021-08-08	AP-T4 Exposed	6.27			1622
2021-08-09	AP-C Unexposed	6.87			1865
2021-08-09	AP-T1 Unexposed	6.84			1914
2021-08-09	AP-T2 Unexposed	6.74			1960
2021-08-09	AP-T3 Unexposed	6.87			1850
2021-08-09	AP-T4 Unexposed	6.74			2038
2021-08-09	AP-C Exposed	6.87			1821
2021-08-09	AP-T1 Exposed	6.87			1876
2021-08-09	AP-T2 Exposed	6.84			1790
2021-08-09	AP-T3 Exposed	7.33			1780
2021-08-09	AP-T4 Exposed	6.87			1940
2021-08-10	AP-C Unexposed	9.17		7.89	2600
2021-08-10	AP-T1 Unexposed	8.84		7.94	2550
2021-08-10	AP-T2 Unexposed	8.74		7.88	2610
2021-08-10	AP-T3 Unexposed	8.87		7.87	2440
2021-08-10	AP-T4 Unexposed	8.74		7.98	2690
2021-08-10	AP-C Exposed	8.87		7.87	2500
2021-08-10	AP-T1 Exposed	8.87		7.91	2490
2021-08-10	AP-T2 Exposed	8.84		7.84	2410
2021-08-10	AP-T3 Exposed	9.93		7.9	2460
2021-08-10	AP-T4 Exposed	8.87		7.89	2610
2021-08-11	AP-C Unexposed	11.67			2970
2021-08-11	AP-T1 Unexposed	11.84			3010
2021-08-11	AP-T2 Unexposed	11.74			3080
2021-08-11	AP-T3 Unexposed	11.87			2930
2021-08-11	AP-T4 Unexposed	11.24			3170
2021-08-11	AP-C Exposed	11.87			2900
2021-08-11	AP-T1 Exposed	11.87			2950
2021-08-11	AP-T2 Exposed	11.84			2870
2021-08-11	AP-T3 Exposed	12.93			2900
2021-08-11	AP-T4 Exposed	11.87			3080
2021-08-12	AP-C Unexposed	15
2021-08-12	AP-T1 Unexposed	15
2021-08-12	AP-T2 Unexposed	15
2021-08-12	AP-T3 Unexposed	15
2021-08-12	AP-T4 Unexposed	15
2021-08-12	AP-C Exposed	15
2021-08-12	AP-T1 Exposed	15
2021-08-12	AP-T2 Exposed	15
2021-08-12	AP-T3 Exposed	15
2021-08-12	AP-T4 Exposed	15
2021-08-19	AP-C Unexposed		22.7	7.67	4.25
2021-08-19	AP-T1 Unexposed		24.3	7.65	4.32
2021-08-19	AP-T2 Unexposed		22.2	7.65	4.24
2021-08-19	AP-T3 Unexposed		22.2	7.64	4.22
2021-08-19	AP-T4 Unexposed		23.4	7.7	4.26
2021-08-19	AP-C Exposed		23.7	7.65	4.26
2021-08-19	AP-T1 Exposed		21.9	7.68	4.2
2021-08-19	AP-T2 Exposed		21.9	7.63	4.22
2021-08-19	AP-T3 Exposed		22.3	7.64	4.2
2021-08-19	AP-T4 Exposed		23.2	7.68	4.27
2021-08-23	AP-C Unexposed		18.9	7.63	4.37
2021-08-23	AP-T1 Unexposed		20.2	7.66	4.44
2021-08-23	AP-T2 Unexposed		18.7	7.63	4.36
2021-08-23	AP-T3 Unexposed		18.7	7.67	4.31
2021-08-23	AP-T4 Unexposed		19.7	7.64	4.34
2021-08-23	AP-C Exposed		20.1	7.63	4.31
2021-08-23	AP-T1 Exposed		19.2	7.68	4.22
2021-08-23	AP-T2 Exposed		18.8	7.59	4.3
2021-08-23	AP-T3 Exposed		19.1	7.64	4.26
2021-08-23	AP-T4 Exposed		20.1	7.67	4.33
2021-08-26	AP-C Unexposed		22.9	7.72	4.48	7.69	96.7	1
2021-08-26	AP-T1 Unexposed		24.7	7.77	4.55	7.45	96.7	1
2021-08-26	AP-T2 Unexposed		22.3	7.69	4.46	7.47	93.9	1
2021-08-26	AP-T3 Unexposed		22.4	7.74	4.42	7.52	93.9	1
2021-08-26	AP-T4 Unexposed		23.5	7.72	4.46	7.72	97.5	1
2021-08-26	AP-C Exposed		24.3	7.69	4.41	7.71	98.3	0.7
2021-08-26	AP-T1 Exposed		23.4	7.72	4.31	7.49	95.4	1
2021-08-26	AP-T2 Exposed		23.4	7.68	4.38	7.8	97.5	1
2021-08-26	AP-T3 Exposed		23.5	7.78	4.37	7.55	95.8	1
2021-08-26	AP-T4 Exposed		24.1	7.73	4.43	7.67	97.6	2
2021-08-30	AP-C Unexposed		23.2	7.72	4.25
2021-08-30	AP-T1 Unexposed		24.9	7.94	4.37
2021-08-30	AP-T2 Unexposed		22.6	7.93	4.26
2021-08-30	AP-T3 Unexposed		22.5	8.01	4.27
2021-08-30	AP-T4 Unexposed		23.7	8	4.28
2021-08-30	AP-C Exposed		25	7.76	4.37
2021-08-30	AP-T1 Exposed		24.5	7.82	4.23
2021-08-30	AP-T2 Exposed		24.1	7.92	4.28
2021-08-30	AP-T3 Exposed		24.6	8.05	4.31
2021-08-30	AP-T4 Exposed		24.9	8.04	4.18
2021-09-02	AP-C Unexposed		22.4	8.08	4.35	7.93	97.6	1.5
2021-09-02	AP-T1 Unexposed		24.3	8.18	4.57	7.71	97.9	2
2021-09-02	AP-T2 Unexposed		22	8.08	4.39	7.76	95.4	1.5
2021-09-02	AP-T3 Unexposed		21.9	8.09	4.45	7.86	96	1.5
2021-09-02	AP-T4 Unexposed		22.8	8.1	4.43	7.95	98.3	1.5
2021-09-02	AP-C Exposed		24.2	8.06	4.48	7.87	99	1.5
2021-09-02	AP-T1 Exposed		23.8	8.05	4.3	7.75	97.1	1.5
2021-09-02	AP-T2 Exposed		23.3	8.06	4.38	8.09	99.1	1.5
2021-09-02	AP-T3 Exposed		23.6	8.13	4.51	7.8	97.2	1.5
2021-09-02	AP-T4 Exposed		24	8.07	4.31	7.87	98.8	1.5
2021-09-06	AP-C Unexposed		22.9	8.2	4.25
2021-09-06	AP-T1 Unexposed		24.9	8.22	4.35
2021-09-06	AP-T2 Unexposed		22.7	8.17	4.25
2021-09-06	AP-T3 Unexposed		22.6	8.17	4.27
2021-09-06	AP-T4 Unexposed		23.5	8.23	4.29
2021-09-06	AP-C Exposed		25	8.2	4.34
2021-09-06	AP-T1 Exposed		24.4	8.19	4.21
2021-09-06	AP-T2 Exposed		24.3	8.18	4.28
2021-09-06	AP-T3 Exposed		24.3	8.14	4.34
2021-09-06	AP-T4 Exposed		24.8	8.2	4.28
2021-09-09	AP-C Unexposed		21.7	8.05	4.4	8.09	98.9	2
2021-09-09	AP-T1 Unexposed		23.9	8.09	4.56	7.88	99.5	2
2021-09-09	AP-T2 Unexposed		21.4	8.02	4.45	8.12	97.8	2
2021-09-09	AP-T3 Unexposed		21.3	8	4.44	8.06	97.5	2
2021-09-09	AP-T4 Unexposed		22.2	8.05	4.46	8.05	98.6	2
2021-09-09	AP-C Exposed		23.4	8.03	4.53	8.09	100.6	2
2021-09-09	AP-T1 Exposed		23.2	8.05	4.36	7.87	9.84	2
2021-09-09	AP-T2 Exposed		22.6	8.01	4.46	8.01	99.1	2
2021-09-09	AP-T3 Exposed		22.9	8.02		8.08	99	2
2021-09-09	AP-T4 Exposed		23.3	8.02	4.47	8.16	100.9	2
2021-08-13	AP-C Unexposed	15	21	7.6	4.2	7.74	92.2			527.898	19.3743	41.5527	8.75284	9.84034	972.034	9.78181	69.4606
2021-08-13	AP-T1 Unexposed	15	25.4	7.87	4.56	6.29	76.9		The air stones were not completely inside the water when the measure was taken	492.322	18.7906	39.8756	8.55325	11.3782	1102.5	10.7971	54.1319
2021-08-13	AP-T2 Unexposed	15	21.2	7.65	4.21	7.91	96.4			490.569	18.9445	35.6088	8.12126	10.2269	884.064	10.4515	69.0447
2021-08-13	AP-T3 Unexposed	15	21.1	7.61	4.16	7.97	95.9			445.068	17.7477	32.0778	7.66249	13.5798	1173.42	10.1707	99.8868
2021-08-13	AP-T4 Unexposed	15	21.4	7.65	4.2	8.21	98.2			528.287	19.2839	43.7945	9.31986	12.1513	1128.81	10.0843	87.3651
2021-08-13	AP-C Exposed	15	21.1	7.63	4.2	8.2	97.5			557.66	19.0445	44.0359	9.46208	12.479	1121.74	10.0626	94.3075
2021-08-13	AP-T1 Exposed	15	20.7	7.47	4.18	7.8	86.1		The air stones were not completely inside the water when the measure was taken	483.356	18.9158	36.8146	8.09457	12.0168	1089.99	10.862	68.8945
2021-08-13	AP-T2 Exposed	15	20.7	7.68	4.18	8.04	96.5			564.497	20.6635	43.6452	8.92597	12.9832	1182.27	10.5163	100.58
2021-08-13	AP-T3 Exposed	15	21.1	7.65	4.16	8.21	98			640.948	20.9582	54.7384	10.8376	9.12605	899.647	9.09052	72.487
2021-08-13	AP-T4 Exposed	15	21.3	7.63	4.19	8.22	98.3			662.941	21.8631	56.9051	11.2276	9.78151	941.933	8.83128	72.4755
2021-09-16	AP-C Unexposed		18.2	7.85	4.3	8.77	100	2		334.126		24.9076	5.00058	7.57143	899.984
2021-09-16	AP-T1 Unexposed		19.9	7.93	4.59	8.53	100.2	2		321.007		29.219	5.84412	8.04202	979.387
2021-09-16	AP-T2 Unexposed		18	7.87	4.4	8.57	97.9	2		346.003		27.1613	5.31776	7.37815	891.93
2021-09-16	AP-T3 Unexposed		18.1	7.89	4.37	8.7	99.2	2		496.839		45.1459	7.56029	6.80672	720.381
2021-09-16	AP-T4 Unexposed		18.9	7.86	4.43	8.74	100.4	2		411.055		35.6186	6.33408	6.72269	734.249
2021-09-16	AP-C Exposed		18.7	7.88	4.42	8.84	100.9	2		344.023		26.5238	5.36589	6.2437	610.228
2021-09-16	AP-T1 Exposed		18.4	7.89	4.26	8.69	99.1	2		389.04		30.9582	5.94234	7.43697	868.656
2021-09-16	AP-T2 Exposed		18	7.85	4.38	8.81	100	2		239.486	3.80729	17.6876	4.28569	7.9916	970.416
2021-09-16	AP-T3 Exposed		18.3	7.85	4.4	8.82	100.3	2		339.818		25.2942	5.15071	7.68067	962.102
2021-09-16	AP-T4 Exposed		18.5	7.89	4.39	8.74	100.1	2		364.071		34.4467	6.28733	7.97479	884.765
