# Supplementary material
Source: MDPI journal article supplement (https://www.mdpi.com/2073-4441/15/11/2109)
Supplement: s1 [file s1 › 20230420 Supplementary Spreadsheet S2.xlsx]

## Sheet: Shoot elements
ID	plant	tissue	technical rep	system	treat	infection	C	H	N	Na	Mg	Al	Si	P	S	Cl	K	Ca	Ti	V	Cr	Mn	Fe	Ni	Cu	Zn	Ga	Ge	As	Br	Rb	Sr	Y	Zr	Nb	Mo	Ag	Cd	Sn	Sb	Te	I	Cs	Ba	La	Ce	Ta	W	Hg
HP1	1	shoot		HP	C	No	37.9	5.54	3.189	52780	5618	457.6	273.9	10130	3011	33360	33420	14310	6	10		178.1	105.2	12.4	11.6	52	0.2			6.7	4.8	62.6		0.1		1.3			0.3				10.8		0.7		19.3
HP1	3	shoot		HP	C	No	38.8	5.63	3.442	52920	5560	397.4		9835	3018	33380	32860	14470	6.1	10		170.5	79.8	11.6	11.2	49.8				6.3	4.3	63.2				0.3	0.9			0.2	1.1		8		9.4		20
HP1	5	shoot		HP	C	No	38.6	5.68	3.118	50060	5096	367.9		9330	2695	31620	32120	13400		10		173.6	57.5	11.5	10.8	48.3				6	3.9	57.8			0.7	1.7									16.3		20.5	1.5
HP2	1	shoot		HP	T1	No	38.7	5.8	2.943	41700	4263	390.3		7117	2175	28870	29140	11780		9.6		146.6	42.8	11.9	8.4	45.8			0.1	5.4	3.9	52.4				1.3				0.4					10.9		21.1		0.1
HP2	3	shoot		HP	T1	No	39	5.88	2.616	37660	3868	357.4	163.3	6587	2120	26670	27630	11030		8.2		139.8	57	12.6	8.2	39.4			0.1	5.1	3.4	48.7	0.1			0.8	0.7			0.1				7.2	5.8		21.1
HP2	5	shoot		HP	T1	No	38.5	5.79	2.845	40540	4325	537.8	533.1	7135	2237	28060	29760	11870	21.8	9.6	4.3	162.8	204.3	11.9	9.9	39.5				5	3.7	52.9	0.3			1.4		0.1		0.1					14.6		19.7
HP3	1	shoot		HP	T2	No	38.9	5.73	3.158	49370	5376	498.6		9083	2628	31310	29220	13040	1.7	8.6		134	90.4	13.4	11.8	50.8				5.7	3.8	59.4			0.3								13.3	8.7	0.3		20.4
HP3	3	shoot		HP	T2	No	38	5.62	3.448	51020	5643	605	493	9866	2768	32270	32010	13700	15.5	10		137.5	144.5	12	12.6	52.3				5.7	4.3	61.6	0.6	0.8	0.2	1		0.5		0.7						18.2	19.7	0.4
HP3	5	shoot		HP	T2	No	38.8	5.88	2.384	41600	4436	329.4		7294	2172	26000	23420	10130		8.7		74.4	75.3	12.7	8.8	34				5	2.7	43.7	0.4	3.8		1.4			0.3	0.5		2					20.8
HP4	1	shoot		HP	T3	No	37.7	5.55	3.119	54260	5946	565		8948	2669	32310	29410	12210	11.1	9.9		88.2	135.7	11.9	9.3	60.7				5.7	3.9	54.4	0.4		0.2	1.7		0.5			0.7						24.2
HP4	3	shoot		HP	T3	No	39.1	5.88	2.532	40280	4692	365.7	250	6928	2119	24720	22330	9778	4.6	9.1		56.7	97.8	13.5	9.4	47.9		0.2		4.9	2.7	40.9	0.3			1.7					1.4		12.1			11.2	21.4
HP4	5	shoot		HP	T3	No	38.8	5.84	2.704	44250	4777	307		7278	2223	26360	22930	10070	0.5	9.1		55.2	63.7	12.3	7.2	47.8				4.6	2.8	43.1	0.5			1.5	2.8	0.7		1.1	0.6	1.3					25.2
HP5	1	shoot		HP	T4	No	38.6	5.78	3.09	39720	3740	291		6900	2072	24280	24810	9904		9.3		178.5	52.1	12.1	7.9	34.9				4.3	4.8	43.5	0.6			0.8						2.7					21.7
HP5	3	shoot		HP	T4	No	38.9	5.95	2.939	46470	4653	539.4	375.2	8533	2316	30230	30380	12170	4.3	9.8		189.5	98.5	12.2	9.5	43.5				5.7	6	55.4	0.6	0.5	0.2	0.9	2.5	1.4					17.7				20.6
HP5	5	shoot		HP	T4	No	39.3	5.94	2.426	39580	3886	305.4		7649	2312	24930	26700	10190	3.1	9.2		173.8	70.3	13	9.2	37.6			0.2	4.7	4.8	45.2				0.9											22.9
AP1	1	shoot		AP	C	No	39.7	5.93	2.532	34840	2887	456.4	444.7	5040	2154	21190	27350	7331	8.6	8.9		21.1	140.1	12.9	7.3	36.6			0.4	4	6.3	20.6	0.3	1.2	0.2	1.4	1.4	1				1.3			5.7	35.3	20.3
AP	3	shoot		AP	C	No	39.4	5.83	2.777	32470	2911	358.4	281.3	5607	2191	18380	27830	7029	9.9	9		19.8	114.2	12.6	5.9	36.9			0.1	3.5	5.8	18.9	0.4	0.4	0.3	0.8		0.2	1.5	1.6							23.9
AP	5	shoot		AP	C	No	39.6	5.89	3.004	31240	2784	453.5		5534	2191	17890	28320	6829	3.6	7.9		17.2	86.6	12.9	8.1	34.9				3.8	5.7	18.3	0.3				2.6	1.3		0.8	0.1			7.1	4.4		19.7
AP2	1	shoot		AP	T1	No	39.7	5.91	2.682	34880	2940	436	107.1	5425	1993	25310	28200	7922	8.9	9.2		33.4	67	12.2	5.2	31.4			0.4	4.7	6.2	21.4	0.2		0.5	1.8		0.7		2.1							23.2		0.4
AP2	3	shoot		AP	T1	No	39.6	5.89	2.6	33590	2704	504.8	185.5	5349	1950	24700	29030	7399	4	9.3		39.4	99.4	13	6.9	33.1				4.5	6.6	20	0.4			0.7	0.9	1.3							9.1	3.9	19.7		0.1
AP2	5	shoot		AP	T1	No	39.8	5.89	2.748	33500	2712	441.5		5800	2103	22540	28130	7301	4.5	8.3		35.2	99.4	12.4	6.4	32.3			0.3	4.4	6.5	20.3	0.6			0.8		0.2				1.8		0.7			21.5		0.1
AP3	1	shoot		AP	T2	No	39.5	5.91	3.034	34760	3168	663	735.7	5631	2314	21860	27070	6840	20.8	8	2.4	32.6	152.4	14.2	8	39.5			0.4	4.2	6	19.1	0.3	0.9	0.2	1.6	0.8	0.1		2.6				5.8			20.7
AP3	3	shoot		AP	T2	No	38.9	5.81	3.495	38870	3630	496.6	147.4	6780	2748	22690	33200	8238	9.5	9.7		38.3	127.8	12.9	8.6	45.7			0.5	4	7.6	23.1	0.7			0.6				1.6							20.2		0.3
AP3	5	shoot		AP	T2	No	39	5.9	2.986	36140	3355	698.5	737.3	6193	2484	21010	31180	7378	10.6	8.1		37.1	205.2	13.9	7	40.6		0.1	0.9	4.1	6.9	20.4	0.2			0.4				0.4				9.9		8.1	20.7
AP4	1	shoot		AP	T3	No	39.5	5.88	3.104	36990	3347	403.8		6156	2553	23600	32720	7717	1.6	9.6		39.3	90.3	12.7	9.6	45.8			0.4	4.5	7	19.9	0.2			2	2.2			1.3	0.6					11.2	20.5		0.1
AP4	3	shoot		AP	T3	No	39	5.8	3.455	34670	3245	371.5	237.1	6477	2540	20940	32970	7846	7.5	9.2		41	133.6	13.1	8.6	48.6				3.7	7.1	21.6	0.2	0.4	0.3	0.8	0.7								2.6	26.8	22.9		0.1
AP4	5	shoot		AP	T3	No	40	5.91	2.9	30940	2841	319.6		5665	2257	19100	29820	6977		8.9		35.7	129.9	12.9	9.6	42.6				3	6.5	19.4	0.3		0.3	1.3		0.2		0.2					15.4	7.5	20.4	0.4
AP5	3	shoot	1	AP	T4	No	39.5	5.94	2.936	32100	2785	458.3	531.8	5513	2173	20270	28180	6604	10	8.3		23.9	123.5	12.2	8.3	31.8				3.8	8.2	18.1	0.7	0.6		0.5		0.1		0.2	1.1			0.6			20.4
AP5	3	shoot	2	AP	T4	No	39.2	5.86	2.675	30280	2744	343.3	196.5	5563	2075	19270	28360	6768	17	8.9	2	29.2	115.5	12.6	8.2	34.2				3.7	8.2	19.3	0.6		0.2	1.2		0.4			0.3						20.4	1.2
AP5	5	shoot	1	AP	T4	No	39.4	5.93	2.878
AP5	5	shoot	2	AP	T4	No	39.4	5.87	2.971
HP6	1	shoot		HP	C	Yes	38.1	5.28	3.179	43970	4228	526.4	370.2	7832	2352	28810	30390	10170		9.6		258	64.1	12.4	10	45.8		0.2		5.1	3.5	47.1	0.1			2.7				0.5		3.8			7.5		21
HP6	3	shoot		HP	C	Yes	38.2	5.67	2.778	42710	4459	364.3		7529	2405	28770	29350	10220	1.8	8.6		224.7	60.8	13	9.2	42.6		0.1	0.4	4.9	3.5	46				1	0.5							3.9			21.9
HP6	5	shoot		HP	C	Yes	39.1	5.82	2.626	41080	4100	352.7	189.9	6684	2132	25800	23690	9426		8.1		212.9	82.7	12.4	7.7	39.4			0.3	4.7	2.8	41.7	0.4		0.4	1.7	1.1						8.3	7.3			23
HP7	1	shoot		HP	T1	Yes	38.8	5.74	2.575	41920	4023	493.5	372.7	6619	2080	28000	23270	10890	4.2	9.4		136.9	99.3	12.7	9.8	54.1				5.3	3.2	47.2	0.7	0.7		1.9		0.7		0.6		1.9					19	0.4
HP7	3	shoot		HP	T1	Yes	38.5	5.69	2.682	40880	3882	385.9		7038	2165	27490	25720	10610		9.4		144.8	53	12.4	9.9	56.8				5	3.2	46.6	0.3			0.6		0.4		0.2		2.4					19.5
HP7	5	shoot		HP	T1	Yes	38.2	5.55	2.99	50520	4722	768	255.1	8029	2271	32730	28300	13020	7.3	8.8		165.3	95.3	12.7	10.3	68.3			0.2	5.8	3.8	57.4	0.6		0.3	1.3	0.9	0.5	1.8		0.2			5.8			20.9
HP8	1	shoot		HP	T2	Yes	39.3	5.81	2.403	42710	4431	363.8		6950	2205	26430	23010	11470		9.5		82.1	53.8	12.6	9.2	49.8		0.2		4.8	2.7	50			0.6	2.1											21.5
HP8	3	shoot		HP	T2	Yes	38.1	5.5	3.139	55730	5631	503		9890	3038	34170	30490	15170		10		105.5	79	13.2	12.7	66.2			0.2	6.4	4	66.6			0.4	1.2	2.4	1.4				2					21.1
HP8	5	shoot		HP	T2	Yes	38.6	5.78	2.864	42450	4532	373.4		7445	2305	27700	24420	11210	2.8	9.4		66.2	65.4	13.2	10	47.4			0.2	5.2	3.2	50.1	0.7			1.6		0.6		1.3	1						21.8
HP9	1	shoot		HP	T3	Yes	38.5	5.83	2.707	40780	4894	329.1		7759	2316	26890	25740	10820	10.6	9.6		68.4	92.7	12	11.4	56.3				4.6	3.4	45	0.7			1.3											20.6
HP9	3	shoot		HP	T3	Yes	38.5	5.82	2.669	40000	4868	296.1		7761	2411	25260	24540	10880		9.4		80.1	56.9	12.3	11.6	60			0.4	4.3	3	45.3	0.3			1.8				0.8					5.7		20.1	0.9
HP9	5	shoot		HP	T3	Yes	39.1	5.89	2.534	40560	4435	347.5		7066	2216	25460	24510	10080	0.2	9.3		66.4	58.2	13	10.4	52.1			0.3	4.3	3.1	41.4	0.5		0.4	1.8			0.7	1.8	2.2				20.7		20.3
HP10	1	shoot		HP	T4	Yes	38.3	5.72	3.223	44460	4295	416.8		8167	2448	28770	30110	10500		9.8		157.8	58.6	11.3	9.9	44.9			0.2	5	5.7	47.7	0.6		0.6	1.3		0.7				1.3				4.2	20.9	0.6
HP10	3	shoot		HP	T4	Yes	38.7	5.72	2.992	45660	4268	582.3		8502	2505	29350	30800	11020		8.8		177.6	65.7	12.4	9.8	47			0.3	5	5.6	50.5	0.2			0.7		0.6						3.1	14.7		21.4		0.1
HP10	5	shoot		HP	T4	Yes	38.3	5.75	3.042	41580	4426	352.9		7727	2383	27470	28370	10410		8		155.5	64.5	13.5	9.2	43.2				4.8	5.2	45.8	0.2			0.8			2.2					15.4	27.8		20.9
AP6	1	shoot	1	AP	C	Yes	39.8	5.84	3.206	36220	2989	413.3	254.9	5947	2452	20330	31670	7887	8.7	8.2		20.7	91	12.7	8.2	39	0.2			4	7	21.9				0.9	0.8	0.3		2			18.7	5.5	7.4		20.2
AP6	1	shoot	2	AP	C	Yes	39.8	5.85	3.23	34220	2825	374.2	196.1	5710	2276	20690	29950	7217	11.1	7.8		16	98.9	12.6	8.3	36.5				3.9	6.7	21.1	0.6		0.3	1.1		0.1		1.3	0.8			10.6		14	19.6
AP6	3	shoot	1	AP	C	Yes	39.2	5.89	3.07	31120	2345	604.6	627.6	4107	1853	17890	21790	6209	1.4	8.2		15	98.3	13.9	6.8	31.6	0.1			4.3	4.7	15.5	0.6	1.1	0.5	1.3	2.9	1.1		0.4				0.6	9.2		19.6
AP6	3	shoot	2	AP	C	Yes	39.4	5.88	3.402
AP7	1	shoot		AP	T1	Yes	38.9	5.91	3.006	34640	2882	482.5	150.3	5785	2228	24310	31410	7553	3.6	7.8		22.4	67.5	12.9	7.8	33	0.1		0.4	4.2	6.7	21.4				0.9								13.5			19.2
AP7	3	shoot		AP	T1	Yes	38.5	5.75	3.448	42000	3512	487.6		8022	3047	26430	37190	10020	10.7	9.8		30.4	115.4	12.1	9.3	41.9			0.2	5	8.5	28.2	0.4														20.4
AP7	5	shoot		AP	T1	Yes	39.7	5.94	2.454	29750	2538	356.1		5142	1981	21090	27190	6233	6.9	8.9		15	76	13	6.5	23.7			0.2	4.2	5.8	17					0.6	0.4									19.6
AP8	1	shoot		AP	T2	Yes	39.5	5.92	2.782	32080	2634	273.6	89	5300	2191	17630	27280	6543	5.8	8.2		21.6	79.7	13.9	6.1	37.4	0.2			3.6	5.6	17.6	0.5	0.2		0.3		0.6					8.1	1.7	6.7		18.9
AP8	3	shoot		AP	T2	Yes	39	5.81	2.893	35290	2964	379.3	240.4	5886	2449	18700	29250	8049	5.9	8		30.4	107.2	13.9	7.6	50.3				3.8	6.3	22.6	0.2			0.6		0.5					14.1	6.6			22
AP8	5	shoot		AP	T2	Yes	38.6	5.68	3.164	35580	3278	616.7	1055	6201	2554	20480	30540	8176	22.6	8.3	1.4	28.5	226.8	12.7	8.2	44.3	0.2		0.6	3.2	6.9	22.9	0.5	1.2	0.1	1.2		0.6				1.3		1.5			19.9
AP9	1	shoot		AP	T3	Yes	39.8	5.95	2.771	32440	2750	679.5	943.4	5200	2135	19390	26030	6985	7.2	7.3	1.5	38.8	129.6	11.9	9.6	45.6				3.3	5.6	19.1	0.3			0.9		0.7	1.6					16.2	6.4		19.7
AP9	3	shoot		AP	T3	Yes	38.7	5.65	3.529	43630	3948	544.4	572.7	7159	3106	24450	34680	9440	12.1	10		43.1	184.1	14.1	11.6	58.6			0.2	4.5	7.8	25.1		0.6	0.4	0.7	0.5		1				7.6	3.7			23.9
AP9	5	shoot		AP	T3	Yes	39.4	5.85	3.081	37560	2981	480.6	204.6	5875	2466	22610	29490	8105	3.5	9.2		35.9	143.8	12.9	9.5	51			0.2	3.9	7	22.5	0.7	0.6	0.3	1		0.8	0.2				9.3		13.3		22.8
AP10	1	shoot	1	AP	T4	Yes	38.5	5.62	3.52	49050	4033	571.2	486.1	7635	3272	28080	38720	10590	13.7	10		34.3	167.2	12.9	9.3	52.1			0.2	4.3	12	30.7	0.2	0.5	0.1		1.7	0.6			2.5	1.6					22.8
AP10	1	shoot	2	AP	T4	Yes	38.3	5.59	3.433	36040	3450	545.2	794.3	6229	2596	21990	33480	8302	13.7	9.4		23.9	165.6	12.4	7.1	38.6				4.1	10.1	23.4	0.4	0.9	0.4	1.2		0.5		0.6							22.6
AP10	3	shoot	1	AP	T4	Yes	39.6	5.82	3.304	33450	2342	416.2	1168	3793	1619	18250	27520	8252	18.1	12	2.4	30.6	170.3	20.8	5.4	44.6	0.2		0.2	3.1	4.4	13.8	0.8	1.7	0.6	4.4	3.1	2.1	1.5		0.4						23.7		1.4
AP10	3	shoot	2	AP	T4	Yes	39.7	5.82	2.958
[truncated: 4 more columns]
