# Supplementary material
Source: MDPI journal article supplement (https://www.mdpi.com/2073-4441/15/11/2109)
Supplement: s1 [file s1 › 20230420 Supplementary Spreadsheet S3.xlsx]

## Sheet: root elements
ID	tissue	treat	syst	infection	plant	Na	Mg	Al	Si	P	S	Cl	K	Ca	Ti	V	Cr	Mn	Fe	Ni	Cu	Zn	Ga	As	Se	Br	Rb	Sr	Y	Zr	Nb	Mo	Ag	Cd	Sn	Sb	Te	I	Ba	La	Ce	Ta	W	Tl	Pb	Th	U
HP1	root	C	HP	No	1	52570	8500	547	195.6	13090	3536	39900	13970	16090	50.3	9.1	3.8	546.2	1984	12.5	20.1	48.8		0.3		7.5	2.7	90.8				2.4				2.4	1		24.9	1.1		21.5	0.9		0.1	0.6	1.9
HP2	root	T1	HP	No	1	45340	8528	386.8		15000	3815	34720	13400	17980	43.1	10		653.7	2329	13	26.3	78.8		0.2		8.4	2.4	101.2	0.6			1.5		0.2					15.5	1.2		19.9		0.2	0.3	0.7	2.2
HP3	root	T2	HP	No	1	51540	8049	520	216.9	14320	4019	38780	13460	15850	52	7.3		571.6	1949	14.3	25.4	47.7		0.3		10.2	2.2	86.2	0.7		0.3	1.7	0.7	0.1		1.1	0.2	2.8	31.7			20.4			0.1	0.9	1.9
HP4	root	T3	HP	No	1	44940	7106	830	938	14030	3967	33490	12790	19130	138.8	12.2		800.5	6297	13.6	31	85.2	0.4	0.3		17.9	2.4	117.4	0.7		0.2	1.8	1.6			1.7	0.4		49.2		18.5	19.4			0.5	0.9	2
HP5	root	T4	HP	No	1	45130	8101	441		12790	3737	35930	13290	15630	45	12		549	1868	13.5	24.1	54.3	0.3			7.9	3.5	86	0.6			1.9		0.6	2.2	0.6			21.7		17.9	18.4	0.4	0.1	0.8	0.8	1.5
AP1	root	C	AP	No	1	51790	6226	1214	3347	6035	6770	38280	20150	8228	108	22.6	3.2	45.3	3644	16	31.7	55.2	0.2	2.4	1.4	30.5	4.1	34.5	0.8			1.7		2.1	1		2.2	2	20.7			19.9	11.7	0.4	0.8	1.3	1
AP2	root	T1	AP	No	1	43340	6181	997	3344	6179	6066	33670	16000	8364	85.9	19	5.1	140.4	2999	15.1	25.1	67.4		1.9	0.4	21.1	3.5	36.6	0.7	1.3	0.5	0.6				0.4		3.1				19.4	11.2		0.1	0.6
AP3	root	T2	AP	No	1	51750	5733	1370	3731	7851	8365	36760	19900	10280	128.2	23.8	10.4	67.9	3618	16.4	38.8	72		2.2	1.8	54	4.3	41.3	0.8	0.7	0.8	2.7	3.3	1.9	1.5			0.7	21.4		2.8	20	6.5	0.4	1.3	1.5	1.7
AP4	root	T3	AP	No	1	40610	4981	2098	5140	7267	5716	29900	13990	8922	314	13.7	4.7	104.6	15910	15.4	36.8	64.2		3.2	1.2	69.8	4.1	49.7	1.1	3.5	0.4	1.1			0.9			3.5	94.1			20.7	3	0.4	2.7	2.8	1.9
AP5	root	T4	AP	No	1	49130	5732	952	3019	6060	6870	36050	19630	7810	76.4	17.9	6	59.2	3419	15.1	27.9	51.4		2.2	1.1	29.2	5.2	36	0.5	0.3	0.2	1		2.7		0.3		2.4	23.2			21.8	15.7	0.3	0.3	1.1	1.1
HP6	root	C	HP	Yes	1	43380	6753	643	769.2	13630	4227	33300	14200	23400	77	12.1	4.6	791	3051	13.5	25	57.7				8.9	2.3	119	0.6		0.1	1		0.5				2.1	47.7		14.7	20.7		0.2	0.7	0.4	1.9
HP7	root	T1	HP	Yes	1	41230	8085	539	370	12330	3589	34860	12610	16740	47.9	8		431	2306	13.9	23.7	73.7		0.3		10	2.2	94	0.5			0.9				2		4.2	16.5			21.8			0.2	0.7	1.5
HP8	root	T2	HP	Yes	1	36760	6373	555	589.4	10520	3466	34380	11430	19170	76.4	9.6	9.2	536.9	2691	15.9	27.9	68.3		0.6	0.1	16	2	100.8	1		0.3	1.5	2.1			0.5			28.2	11.1		20.4		0.1		1.1	2.2
HP9	root	T3	HP	Yes	1	44920	7853	809	1164	14120	4069	34280	13760	17650	108.1	7.3	2.3	608.5	5209	13.7	30.1	80.9	0.1	0.3		20.2	2.5	109.5	0.6		0.3	1.3				0.5		1.5	29.5			19.3			0.7	0.6	1.7
HP10	root	T4	HP	Yes	1	44550	7392	528	784.9	13840	4308	33810	14390	20500	62.2	7.5	3.5	788.7	2839	14.3	29.8	71.1		0.6		11.1	3.6	106.3			0.2	1		0.5		1		1.2	30.7	17.9	13.8	25.4				0.4	1.9
AP6	root	C	AP	Yes	1	54880	6275	1414	3532	6625	6870	38030	20210	9395	133.2	26.7	8.6	90.9	4786	15.9	33.6	63.6		2.6	1.7	31.9	4.1	41.8	0.9	1.1	0.4	3.2	3.1	1.8	0.8	0.4			25.5	2.1	1	20.1	18.7	0.4	1.5	1.5	1.6
AP7	root	T1	AP	Yes	1	51520	5800	1077	2917	7495	8166	37520	20610	9837	113.9	16.8	9.7	95	2975	15.9	30.1	58.2	0.4	2.3	1.4	33.7	4.6	39.9	0.6	0.8		2.6	2.4	1	0.7	0.6		1.6	15.4	16.9		19.3	4.4	0.4	0.9	1.7	1.8
AP8	root	T2	AP	Yes	1	50500	6013	1534	4406	6795	7418	35700	20400	10590	176.9	25.5	18.5	100.5	3910	16.3	31.4	61.8	0.5	2.8	1.9	37	4.8	44.6	1	1.9	0.4	2.5	2.5	2	2	0.3	0.1	1.3	20			19.9	10.3	0.4	0.9	1.7	1.7
AP9	root	T3	AP	Yes	1	39050	5207	2049	4200	6633	5075	30570	12160	9241	331.2	16.6	4.8	98.5	17120	16.2	35.9	66.2	0.4	3.5	1.2	57.9	3.8	52.6	0.9	2.4	0.4	0.6		1	0.4	2.8		3.2	108			19.1	3	0.2	4.8	2.3	1.2
AP10	root	T4	AP	Yes	1	49920	6161	1480	4191	6303	6733	36740	17970	9118	133.3	21.1	12.6	94.8	3902	15.9	31	58.3		2.4	1.3	30.3	5.3	42.7	0.6	1.9	0.8	2.2	2.7	1.1		0.7		0.6	32.7			20.9	7.4		1	1.4	1.5
